# Supplementary material for: A perspective on the importance of within-tree variation in mortality risk for a leaf-mining insect
Source: Copernicus journal article supplement (doi:10.5194/we-12-27-2012), 2012-05-30
Supplement: Supplementary file 1 [file we-12-27-2012-supplement.pdf]

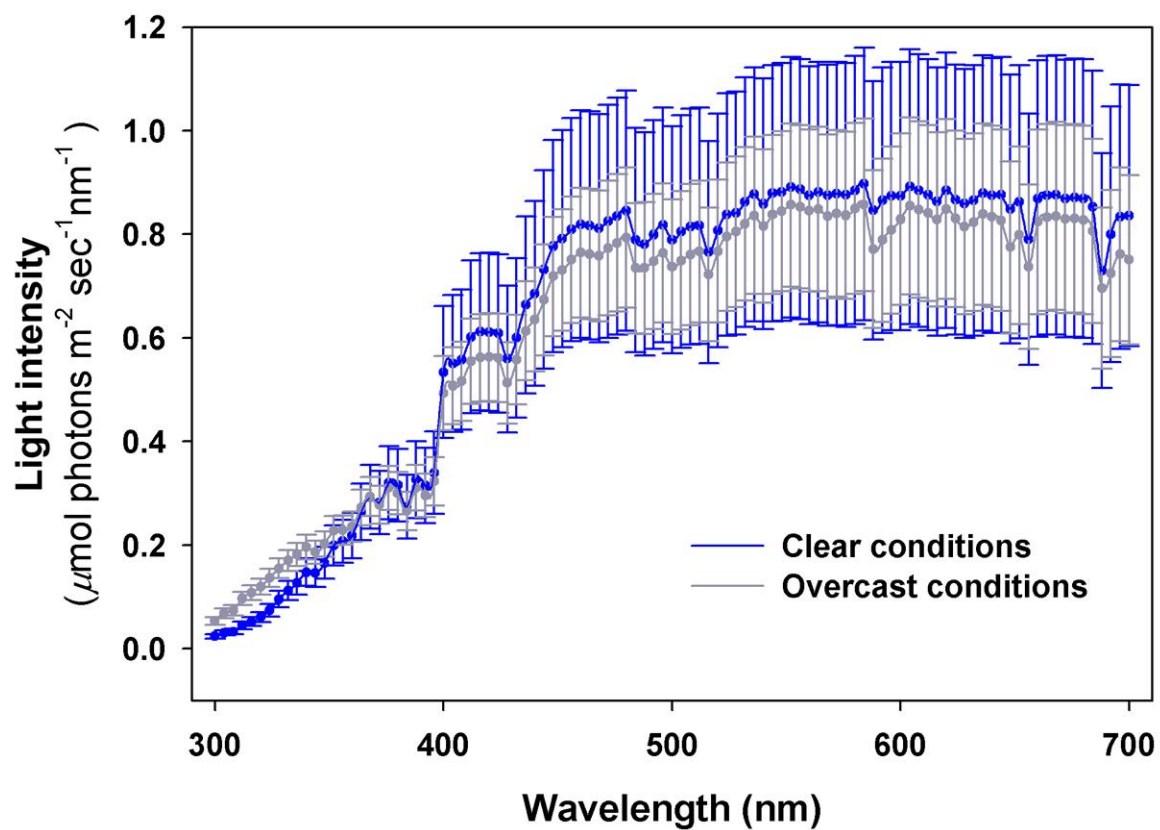

347

348

349 Fig. S1. Mean light intensity (from 300 to 700 nm) on two separate sampling dates when  
350 conditions were clear (26 Aug 2002,  $N = 63$ , black) and overcast (28 Jul 2002,  $N = 57$ , gray)  
351 (mean  $\pm 1$  se). Measurements were taken between 1100-1500 hours.

352
